# Supplementary material for: An emerging trend of rapid increase of leukemia but not all cancers in the aging population in the United States
Source: PubMed Central journal article supplement (PMC6700310; doi:10.1038/s41598-019-48445-1), 2019-08-19
Supplement: 41598_2019_48445_MOESM1_ESM.pdf [file 41598_2019_48445_MOESM1_ESM.pdf]

**An emerging trend of rapid increase of leukemia but not all cancers in the aging population  
in the United States**

Taisen Hao, PhD,<sup>1</sup> Min Li-Talley, PhD,<sup>2</sup> Alison Buck<sup>3</sup>, and WenYong Chen, PhD<sup>1,4</sup>.

<sup>1</sup>Department of Cancer Biology, Beckman Research Institute, City of Hope, Duarte, CA 91010.

<sup>2</sup>Department of Biostatistics, Beckman Research Institute, City of Hope, Duarte, CA 91010.

<sup>3</sup>Department of Biology, Biola University, La Mirada, CA 90638

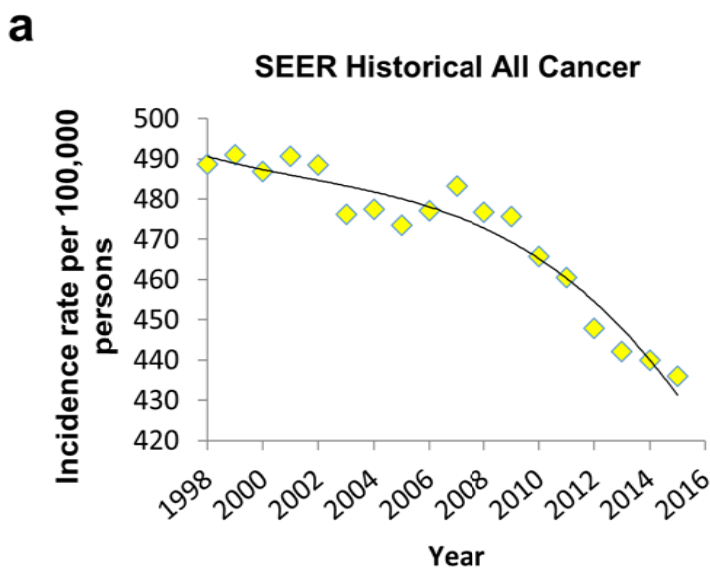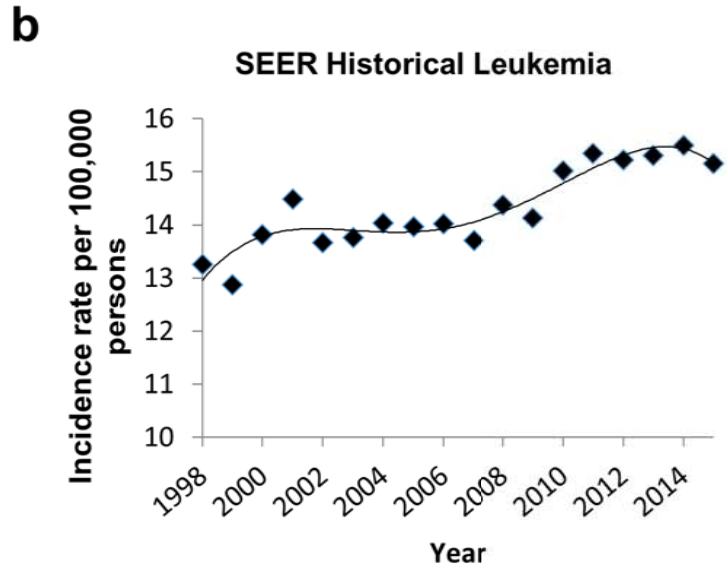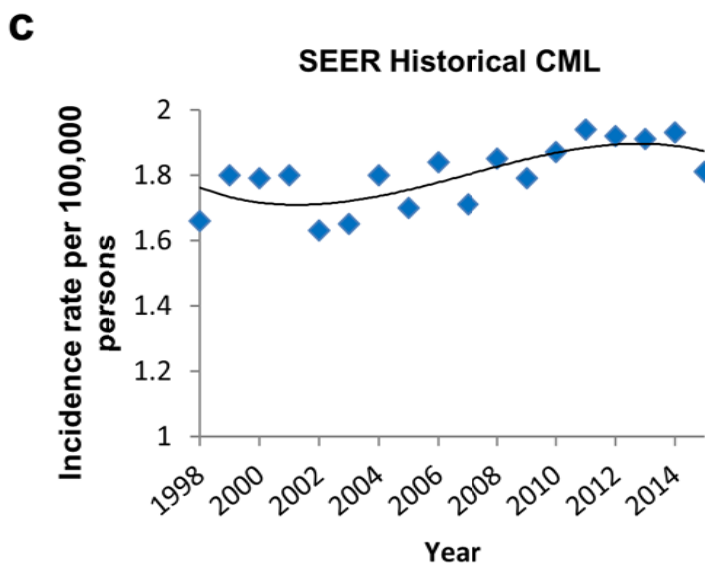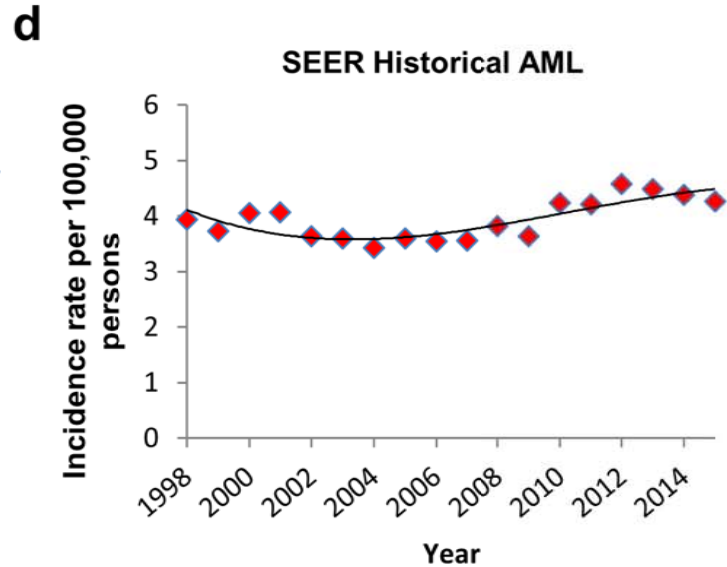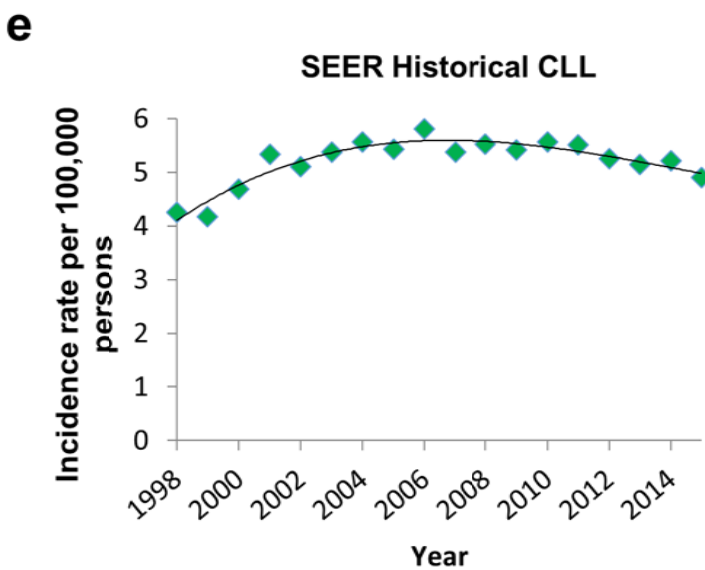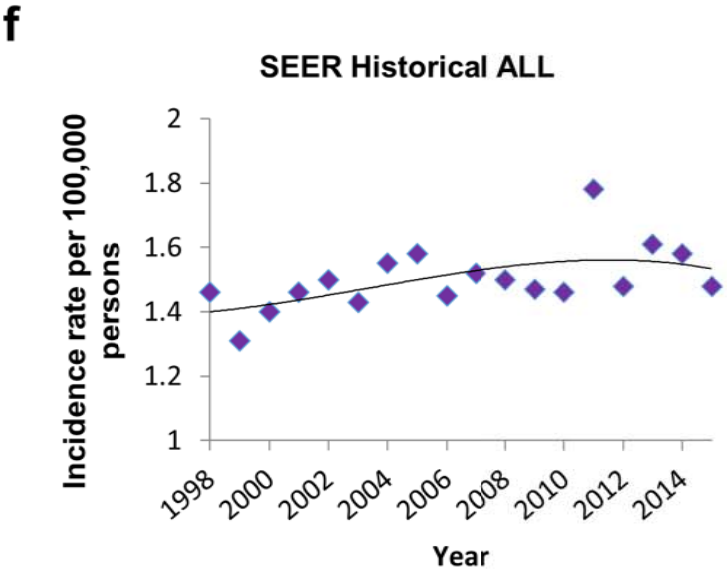

**Supplemental Figure 1** Incidences of leukemia and all cancers by the SEER9 study.

**Table S1** Influence of sex on the correlation of cancer incidences vs the percent population over 65

| Cancer Type          | 1999-2011 |         | 2011-2018    |                   | Overall (1999-2018) |         |
|----------------------|-----------|---------|--------------|-------------------|---------------------|---------|
|                      | r-Value   | p-Value | r-Value      | p-Value           | r-Value             | p-Value |
| Female All Cancers   | 0.90      | <0.0001 | <b>0.94</b>  | <b>0.0006</b>     | 0.94                | <0.0001 |
| Male All Cancers     | 0.84      | 0.0003  | <b>-0.56</b> | <b>0.061</b>      | 0.70                | 0.0006  |
| Female Breast Cancer | 0.04      | 0.90    | 0.80         | 0.017             | 0.69                | 0.0007  |
| Male Breast Cancer   | 0.77      | 0.0019  | 0.87         | 0.0048            | 0.86                | <0.0001 |
| Male Prostate Cancer | 0.05      | 0.87    | <b>-0.94</b> | <b>0.0004</b>     | -0.58               | 0.007   |
| Female Leukemia      | 0.73      | 0.0048  | 0.93         | 0.0009            | 0.90                | <0.0001 |
| Male Leukemia        | 0.80      | 0.001   | 0.97         | <0.0001           | 0.93                | <0.0001 |
| Female CML           | 0.75      | 0.0032  | 0.93         | 0.0008            | 0.96                | <0.0001 |
| Male CML             | 0.23      | 0.45    | 0.91         | 0.002             | 0.91                | <0.0001 |
| Female AML           | 0.42      | 0.16    | <b>0.97</b>  | <b>&lt;0.0001</b> | 0.94                | <0.0001 |
| Male AML             | 0.52      | 0.066   | <b>0.69</b>  | <b>0.059</b>      | 0.88                | <0.0001 |
| Female CLL           | 0.75      | 0.0035  | 0.82         | 0.013             | 0.77                | <0.0001 |
| Male CLL             | 0.78      | 0.0018  | 0.79         | 0.020             | 0.81                | <0.0001 |
| Female ALL           | 0.84      | 0.0003  | 0.16         | 0.70              | 0.78                | <0.0001 |
| Male ALL             | 0.83      | 0.0004  | -0.31        | 0.46              | 0.61                | 0.0047  |

Pearson correlation analyses were performed as in Table 1 for females and and males

**Table S2** Comparison of joint point regression analysis of SEER leukemia data in 2015 and 2016

|                                             | JP Trend 1 |      | JP Trend 2 |     | JP Trend 3 |     | AAPC (2006-16) |         |
|---------------------------------------------|------------|------|------------|-----|------------|-----|----------------|---------|
|                                             | Years      | APC  | Years      | APC | Years      | APC | 2006-15        | 2011-15 |
| <b>1975-2015 SEER leukemia incidence</b>    |            |      |            |     |            |     |                |         |
| SEER 9 Delay-Adjusted Incidence, 1975-2015  |            |      |            |     |            |     |                |         |
| All Races                                   | 1975-99    | 0.2  | 1999-15    | 0.9 |            |     | 0.9            | 0.9     |
| White                                       | 1975-99    | 0.3  | 1999-15    | 1.1 |            |     | 1.1            | 1.1     |
| Black                                       | 1975-15    | 0.2  |            |     |            |     | 0.2            | 0.2     |
| SEER13 Delay -Adjusted Incidence,1992-2015  |            |      |            |     |            |     |                |         |
| All Races                                   | 1992-15    | 0.6  |            |     |            |     | 0.6            | 0.6     |
| White                                       | 1992-15    | 0.8  |            |     |            |     | 0.8            | 0.8     |
| Black                                       | 1992-15    | 0.6  |            |     |            |     | 0.6            | 0.6     |
| <b>1975-2016 SEER leukemia incidence</b>    |            |      |            |     |            |     |                |         |
| SEER 9 Delay-Adjusted Incidence, 1975-2016  |            |      |            |     |            |     |                |         |
| All Races                                   | 1975-98    | 0.2  | 1998-16    | 0.8 |            |     | 2007-16        | 2012-16 |
| White                                       | 1975-98    | 0.3  | 1998-16    | 1   |            |     | 0.8            | 0.8     |
| Black                                       | 1975-16    | 0.3  |            |     |            |     | 1              | 1       |
|                                             |            |      |            |     |            |     | 0.3            | 0.3     |
| SEER 21 Delay-Adjusted Incidence, 2000-2016 |            |      |            |     |            |     |                |         |
| All Races                                   | 2000-07    | 0.1  | 2007-11    | 2.7 | 2011-16    | 0.0 | 1.2            | 0       |
| White                                       | 2000-08    | 0.5  | 2008-11    | 3.3 | 2011-16    | 0.0 | 1.2            | 0       |
| Black                                       | 2000-07    | -1.0 | 2007-16    | 2.2 |            |     | 2.2            | 2.2     |

2015 and 2016 SEER data were extracted from SEER Cancer Statistics Review released in 2018 and 2019, respectively.

The APC is the Annual Percent Change over the time interval.

**Table S3** SEER21 cancer incidence trend from 2007 to 2016

|              | Cancer types | Total APC | Males APC | Females APC |      |
|--------------|--------------|-----------|-----------|-------------|------|
| All races    | All sites    | -1.3      | -2.3      | -0.3        |      |
|              | Breast       | -0.1      | 0.3       | 0.1         |      |
|              | Prostate     | -5.5      | -5.7      | -           |      |
|              | All leukemia | 0.0       | 0.0       | -0.1        |      |
|              | CML          | 1.3       | 1.1       | 1.4         |      |
|              | AML          | 1.6       | 1.8       | 1.2         |      |
|              | CLL          | -0.9      | -0.9      | -1.0        |      |
|              | ALL          | 0.6       | 0.8       | 0.3         |      |
|              | Whites       | All sites | -1.3      | -2.3        | -0.4 |
|              |              | Breast    | -0.2      | 0.0         | -0.1 |
| Prostate     |              | -6.0      | -6.2      | -           |      |
| All leukemia |              | -0.1      | -0.2      | -0.2        |      |
| CML          |              | 1.3       | 1.0       | 1.6         |      |
| AML          |              | 1.6       | 1.7       | 1.3         |      |
| CLL          |              | -1.1      | -1.1      | -1.2        |      |
| ALL          |              | 0.4       | 0.8       | -0.3        |      |
| Blacks       |              | All sites | -1.7      | -3.0        | -0.4 |
|              |              | Breast    | 0.2       | 1.5         | 0.4  |
|              | Prostate     | -4.8      | -5.2      | -           |      |
|              | All leukemia | 0.9       | 0.7       | 1.1         |      |
|              | CML          | 1.6       | 2.1       | 0.8         |      |
|              | AML          | 2.3       | 2.9       | 1.7         |      |
|              | CLL          | 0.6       | 0.2       | 0.7         |      |
|              | ALL          | 0         | -1.4      | 2.4         |      |

SEER21 data were extracted from SEER Cancer Statistics Review 1975-2016 published in 2019.  
The APC is the Annual Percent Change over the time interval.
